# Supplementary material for: Impact of manganese on biofilm formation and cell morphology of Candida parapsilosis clinical isolates with different biofilm forming abilities
Source: PubMed Central journal article supplement — FEMS Yeast Res. 2019 Aug 12;19(6):foz057. doi: 10.1093/femsyr/foz057 (PMC6761954; doi:10.1093/femsyr/foz057), 2019-08-12
Supplement: foz057_supplemental_file.pdf [file foz057_supplemental_file.pdf]

## **Supplementary data:**

Impact of manganese on biofilm formation and cell morphology of *Candida parapsilosis* clinical isolates with different biofilm forming abilities

Sulman Shafeeq, Srisuda Pannanusorn, Youssef Elsharabasy, Bernardo Ramírez-Zavala, Joachim Morschhäuser and Ute Römling

**Table S1:** List of strains used in this study.

| <b>Strains/ Plasmids</b>           | <b>Description</b>                                                                                           | <b>Source</b>    |
|------------------------------------|--------------------------------------------------------------------------------------------------------------|------------------|
| <b><i>C. parapsilosis</i></b>      |                                                                                                              |                  |
| ATCC 22019                         |                                                                                                              | Reference strain |
| SMI 416                            | Isolate from bloodstream infection                                                                           | 1                |
| SMI 501                            | Isolate from bloodstream infection                                                                           | 1                |
| SMI 630                            | Isolate from bloodstream infection                                                                           | 1                |
| SMI 661                            | Isolate from bloodstream infection                                                                           | 1                |
| SMI 681                            | Isolate from bloodstream infection                                                                           | 1                |
| SMI 694                            | Isolate from bloodstream infection                                                                           | 1                |
| SMI 706                            | Isolate from bloodstream infection                                                                           | 1                |
| SMI 798                            | Isolate from bloodstream infection                                                                           | 1                |
| SMI 828                            | Isolate from bloodstream infection                                                                           | 1                |
| SMI 416 <i>bcr1Δ</i>               | <i>BCR1</i> deletion in SMI 416                                                                              | This study       |
| ATCC 22019 <i>bcr1Δ</i>            | <i>BCR1</i> deletion in ATCC 22019                                                                           | This study       |
| ATCC 22019 <i>bcr1Δ</i> +<br>pBCR1 | <i>BCR1</i> complementation in ATCC 22019 <i>bcr1Δ</i> strain                                                | This study       |
| <b>Plasmids</b>                    |                                                                                                              |                  |
| pBCR1CpM2                          | pSFS4 containing left and right flanking region of <i>BCR1</i> gene                                          | 1                |
| pBCR1CpMK1                         | Left flanking region of <i>BCR1</i> in pBCR1CpM2 is replaced with <i>BCR1</i> gene including upstream region | 1                |

### **References**

1. Pannanusorn, S. *et al.* Characterization of biofilm formation and the role of BCR1 in clinical isolates of *Candida parapsilosis*. *Eukaryot. Cell* **13**, 438–451 (2014).

**Figure S1:** Impact of different concentrations of the divalent cations cobalt ( $\text{Co}^{2+}$ ), copper ( $\text{Cu}^{2+}$ ), iron ( $\text{Fe}^{3+}$ ), nickel ( $\text{Ni}^{2+}$ ) and zinc ( $\text{Zn}^{2+}$ ) as nitrate salts on the biofilm forming ability of no (SMI 416), low (SMI 706) and high (SMI 828) biofilm formers of *C. parapsilosis* after 48 h at 37 °C (A, B and C) and 30 °C (D, E and F). Biofilms developed on a polystyrene surface in 96 well plates were stained with crystal violet and the  $\text{OD}_{600}$  was measured after dissolution in 30% acetic acid. Graphs represent the mean values calculated from three independent experiments with three biological replicates each. Error bars indicate the standard deviation.

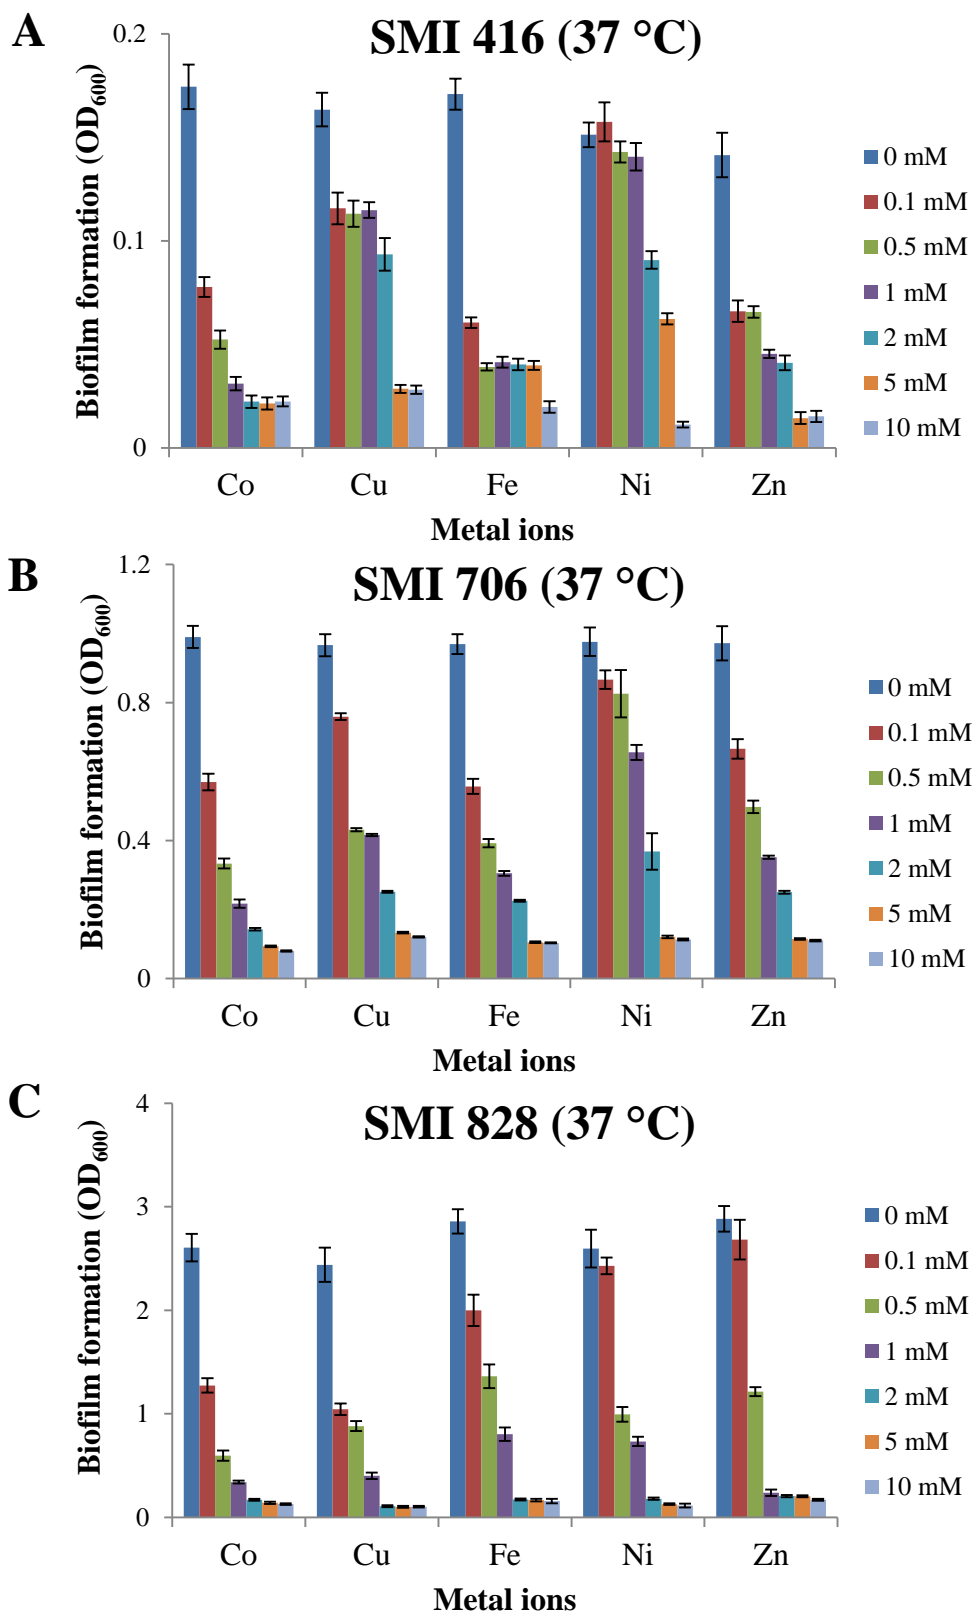

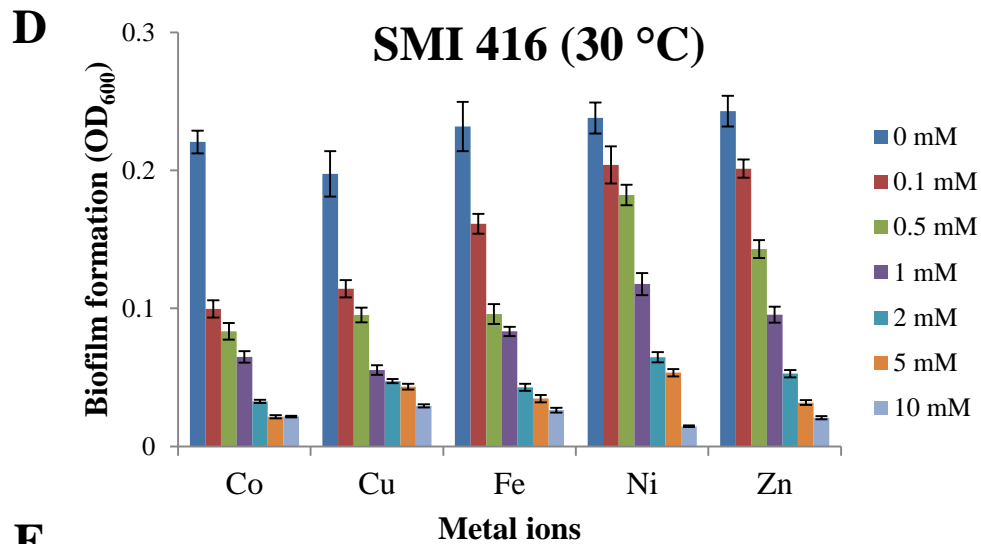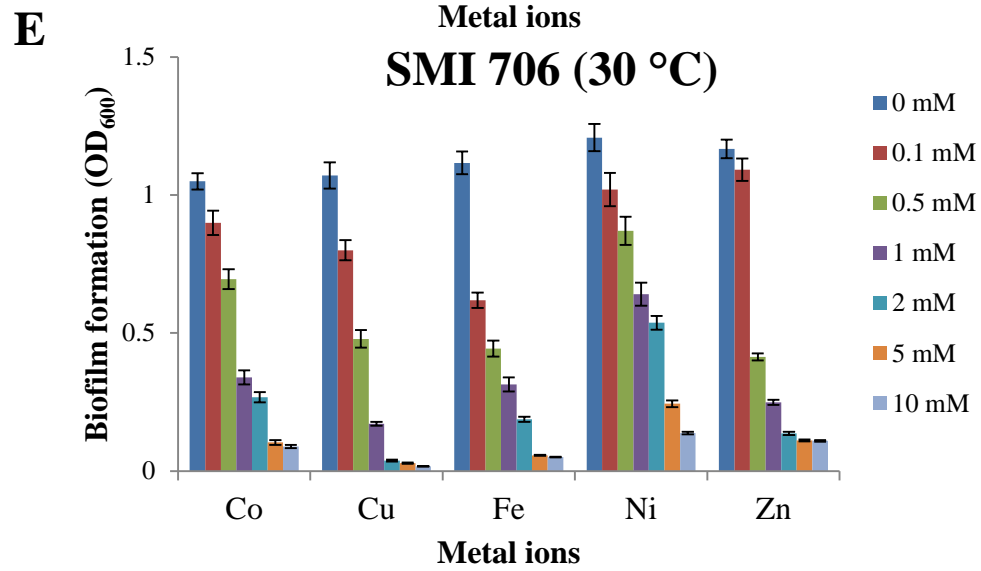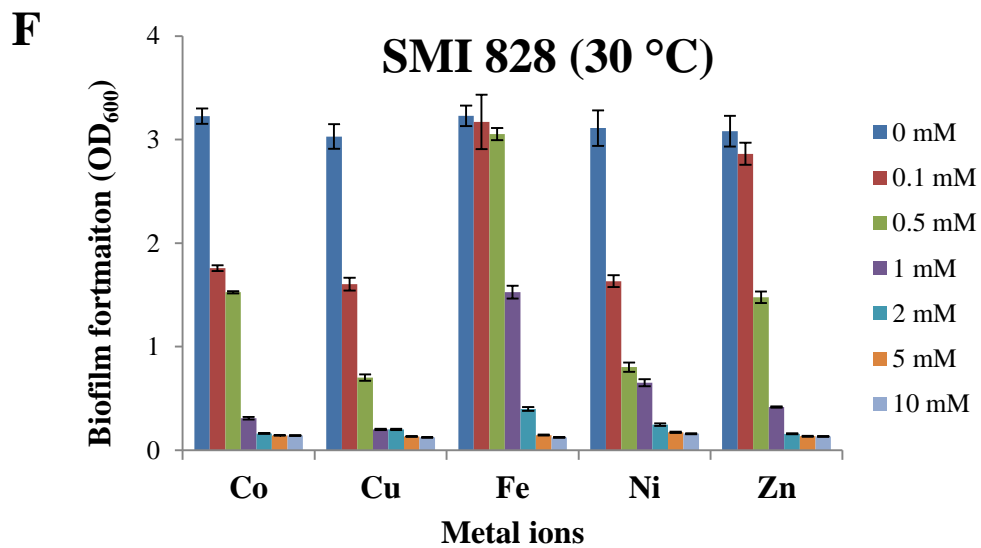

**Figure S2:** Impact of different concentrations of  $Mn^{2+}$  on biofilm forming ability of no (SMI 416 and ATCC 22019), low (SMI 706) and high (SMI 828) biofilm formers of *C. parapsilosis* at 37 °C after 48 h. Biofilms were developed on a polystyrene surface in 96 well plates were stained with crystal violet and the  $OD_{600}$  was measured after dissolution in 30% acetic acid. Graphs represent the mean values calculated from three independent experiments with biological replicates each and error bars indicate the standard deviation. Statistical significance of the differences in biofilm formation in the presence of  $Mn^{2+}$  compared to 0 mM  $Mn^{2+}$  was determined by one-way ANOVA (ns-not significant, \* $P < 0.05$ , \*\* $P < 0.01$  and \*\*\* $P < 0.001$ ).

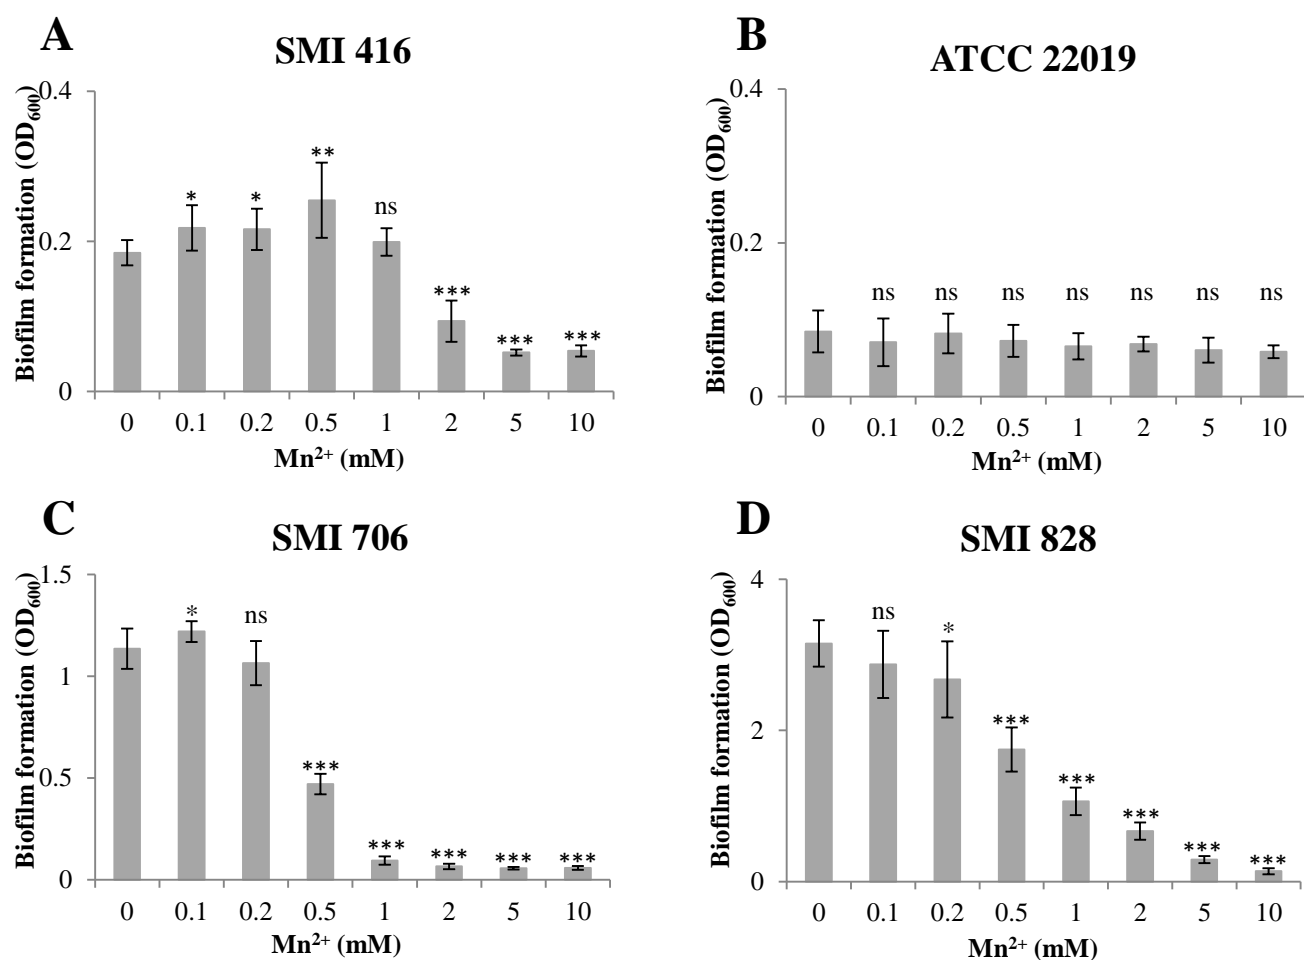

**Figure S3:** Impact of  $Mn^{2+}$  on the biofilm forming ability of *C. parapsilosis* ATCC 22019, SMI 501, SMI 630, SMI 661, SMI 681, SMI 694 and SMI 798 at 30 °C after 48 h. Biofilms were developed on a polystyrene surface in 96 well plates were stained with crystal violet and the  $OD_{600}$  was measured after dissolution in 30% acetic acid. Data points represent the mean values calculated from three independent experiments with three biological replicates each and error bars indicate the standard deviation.

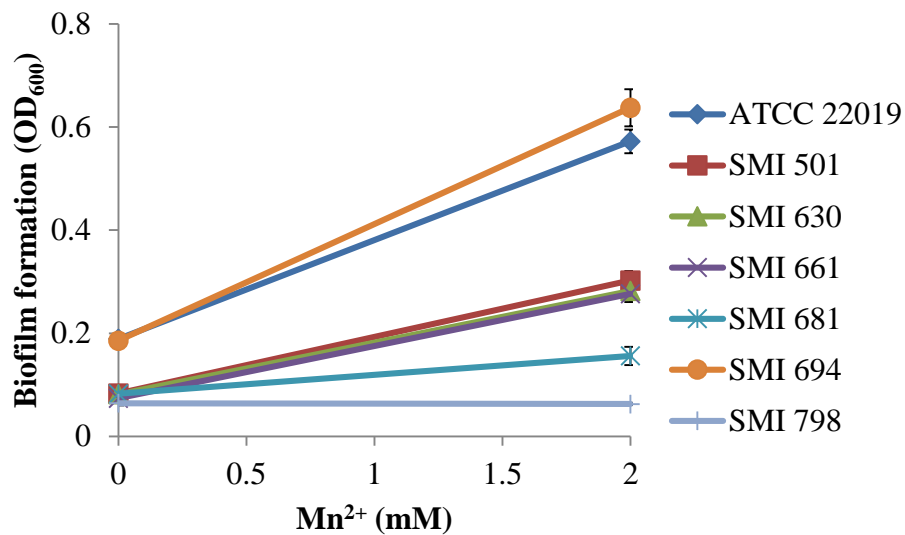

**Figure S4:** Impact of  $Mn^{2+}$  on the attachment of *C. parapsilosis* strains SMI 416 and ATCC22019, and their derivatives. Attachment of wild type (SMI 416 and ATCC 22019), their *BCR1* mutants (SMI 416 *bcr1* $\Delta$  and ATCC 22019 *bcr1* $\Delta$ ), and *BCR1* complementation (ATCC 22019 *bcr1* $\Delta$ +p*BCR1*) at 30 °C after 3 h of incubation (A and B). Relative attachment was calculated with attachment of the respective wild type at 0 mM  $Mn^{2+}$  set as 100%. Cells were allowed to attach to a polystyrene surface in 96 well plates and were subsequently stained with crystal violet. The OD<sub>600</sub> was measured after dissolution of the crystal violet in 30% acetic acid. Graphs represent the mean values calculated from three independent experiments with three biological replicates each and error bars indicate the standard deviation. Statistical significance of the differences in attachment in the presence of 2 mM  $Mn^{2+}$  compared to 0 mM  $Mn^{2+}$  was calculated by one-way ANOVA (ns-not significant).

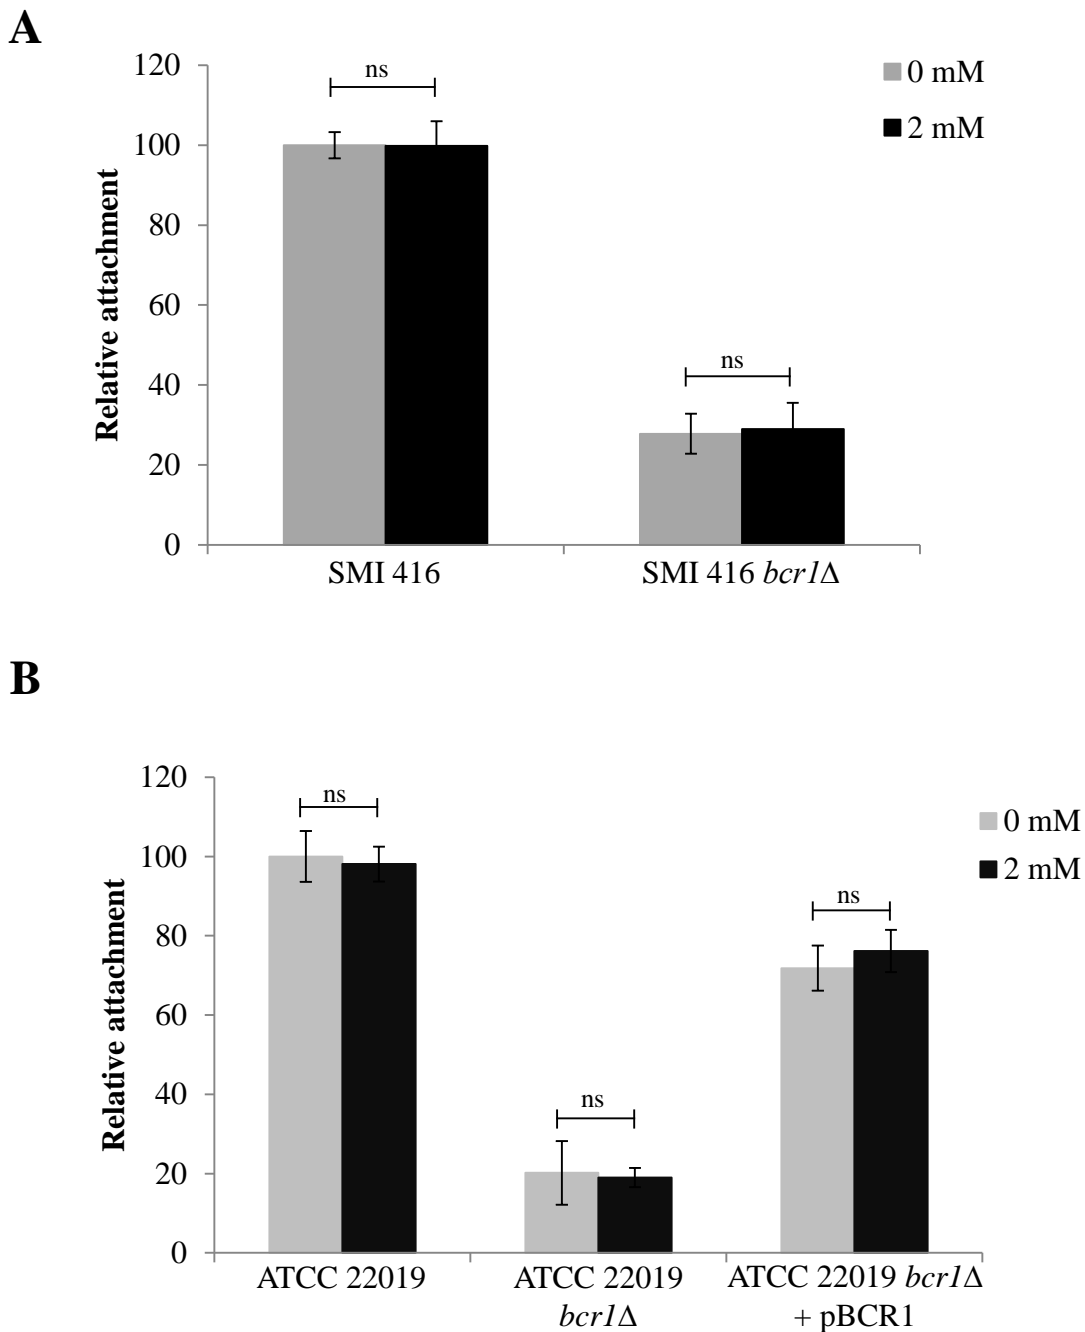

**Figure S5:** Cell viability in biofilms of *C. parapsilosis* SMI 416 wild type formed after 48 h at 30 °C in the presence of 2 mM Mn<sup>2+</sup>. (A) live cells; (B) dead cells; and (C) live/dead cells. Cells were stained with the LIVE/DEAD™ BacLight™ Viability Kit according to the manufacturer's instructions.

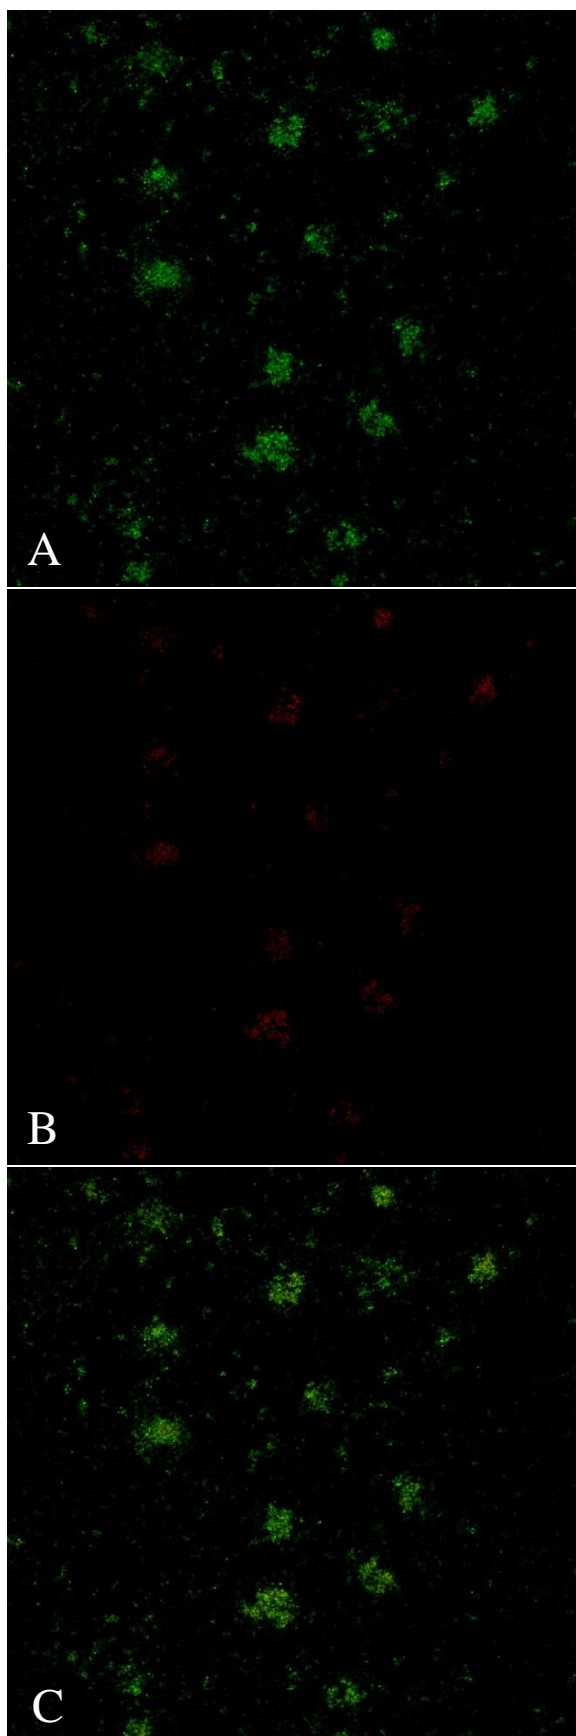

**Figure S6:** Impact of different concentrations of  $Mn^{2+}$  on the biofilm forming ability of wild type (SMI 416 and ATCC 22019), their *bcr1* $\Delta$  mutants (SMI 416 *bcr1* $\Delta$  and ATCC 22019 *bcr1* $\Delta$ ) and *BCR1* complementation (ATCC 22019 *bcr1* $\Delta$ +p*BCR1*) at 37 °C (A and B). Biofilms developed on a polystyrene surface in 96 well plates were stained with crystal violet and the OD<sub>600</sub> was measured after dissolution in 30% acetic acid. Graphs represent the mean values calculated from three independent experiments with three biological replicates each and error bars indicate the standard deviation. Statistical significance of the difference in biofilm formation (wild type SMI 416 and SMI 416 *bcr1* $\Delta$ ) in the presence of  $Mn^{2+}$  compared to 0 mM  $Mn^{2+}$  was calculated by one-way ANOVA (ns-not significant, \*\*P < 0.01, and \*\*\*P < 0.001).

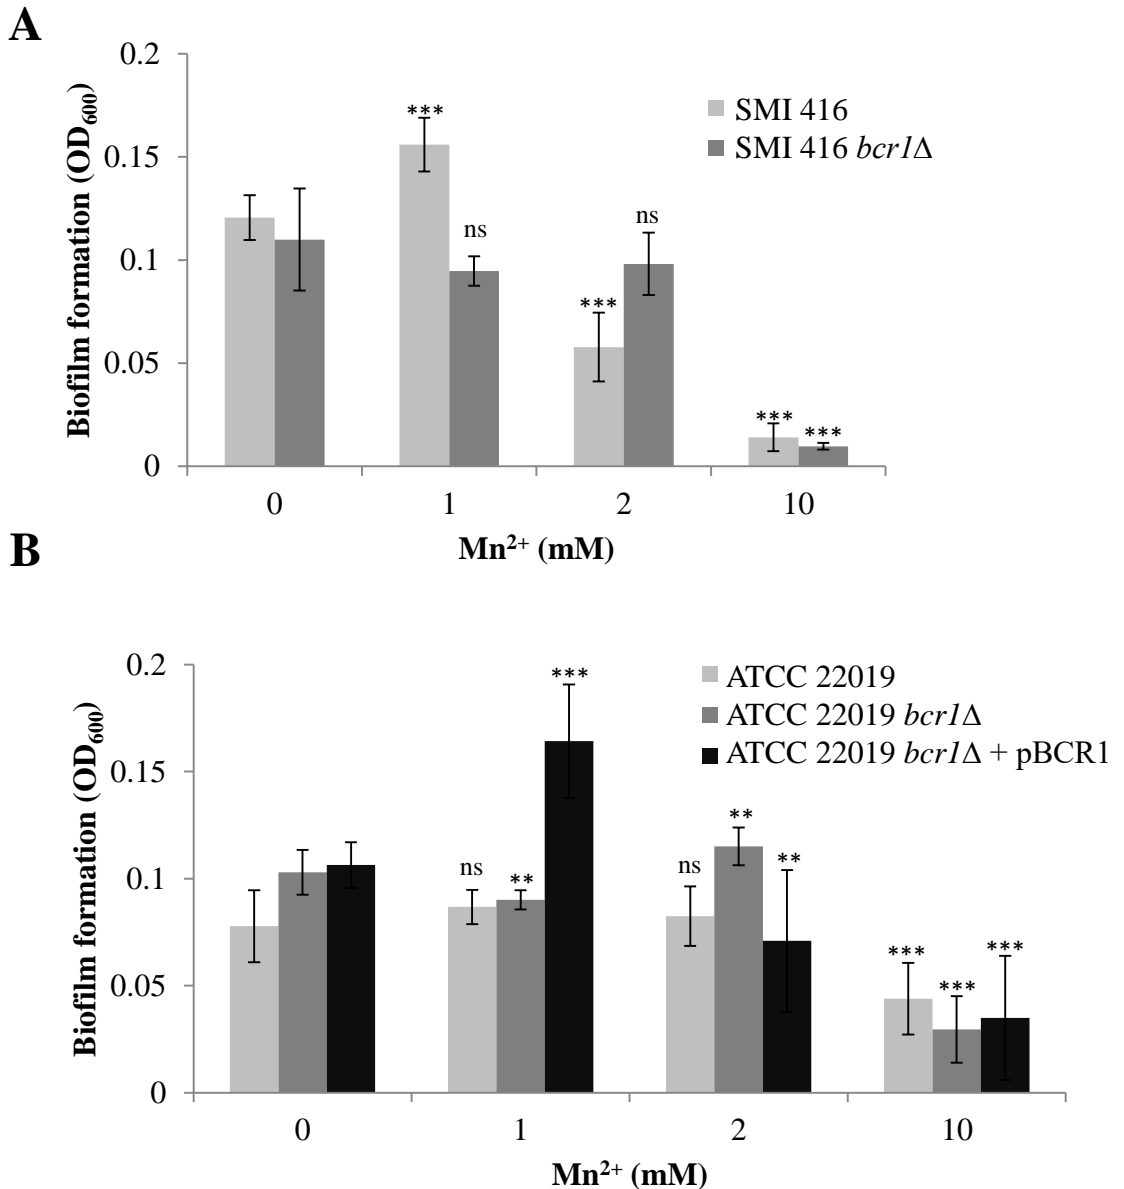



**Figure S7:** Pseudohyphae (A) and hyphae (B, C and D) stained with Calcofluor white (CFW).

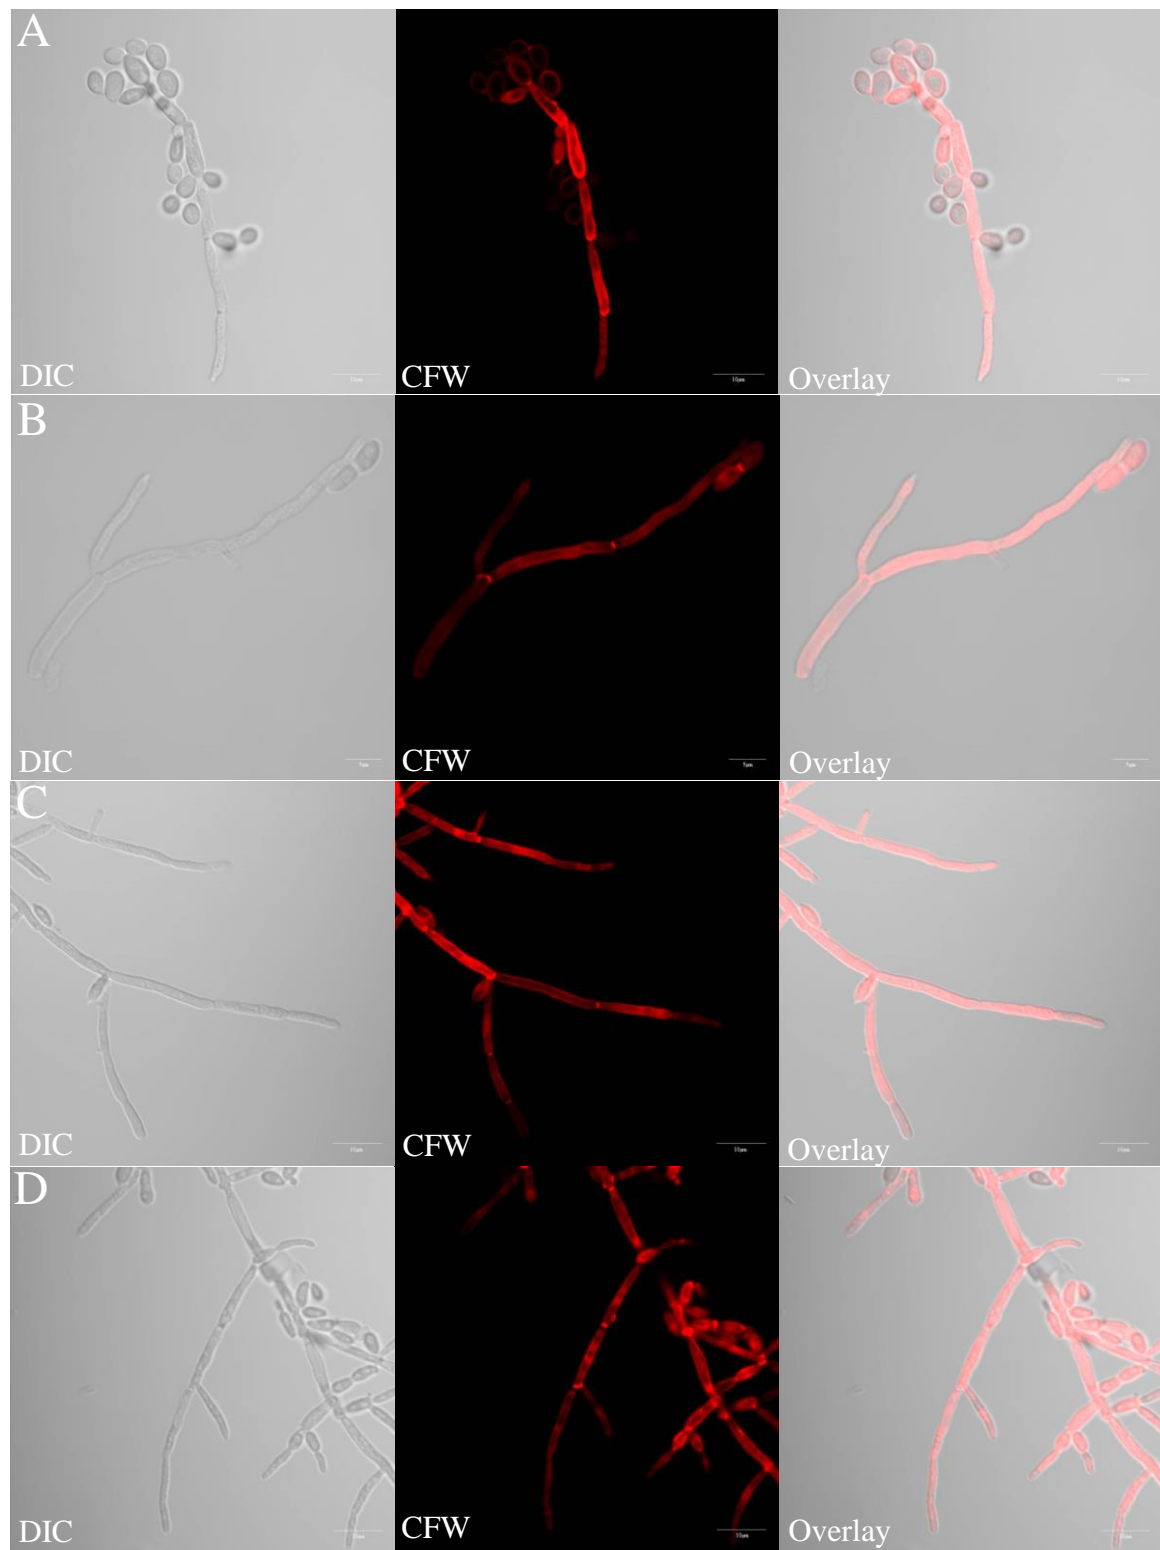

**Figure S8:** Multiple sequence alignment of Bcr1 of *C. viswanathii*, *C. tropicalis*, *C. dubliniensis*, *C. albicans*, *L. elongisporus*, *C. parapsilosis* and *C. orthopsilosis*.

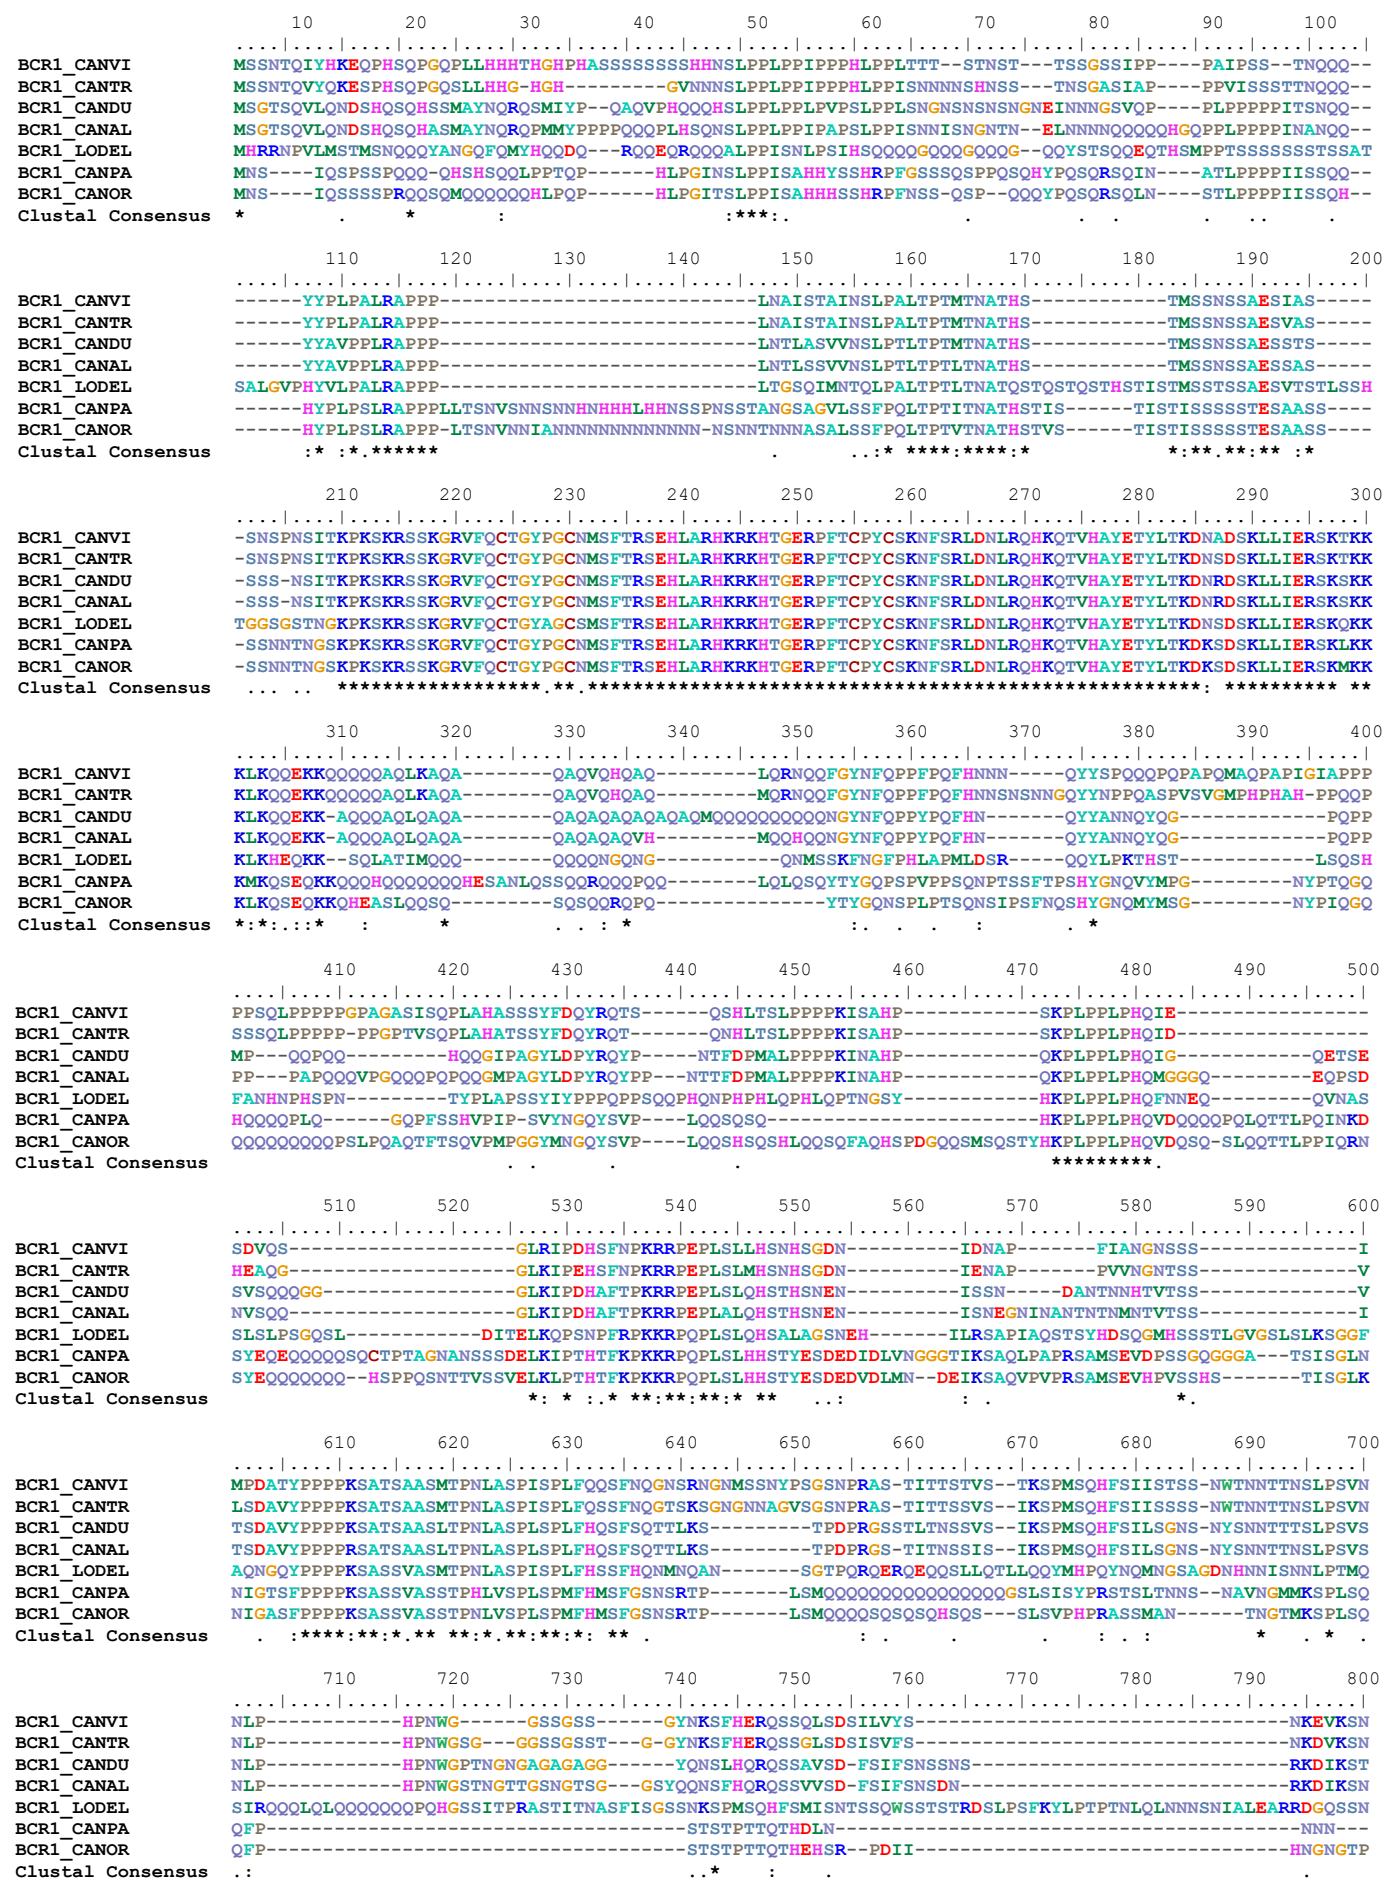

```

      810      820      830      840      850      860      870      880      890      900
BCR1_CANVI WLRGVLNDEENR-----DRDDRRDD-----SMMVDK--DQEED---GGDVS
BCR1_CANTR WLRGVLNDEEEE-----AKGDGDND-----SMMVDKEDDQEDDEENKNQEDCS
BCR1_CANDU WLRGVLNDDTN-----DPQENKLTSP--SPAPTLPPVSSITNG-TNDGNK-----DVIMSESESESQSQ--SQTNL
BCR1_CANAL WLRGVLNDDNNNNNNNNN-----EQQQQLQDPKLASPAPTLPPVSSITGGGTSNGND-----SMMVDNMEMKNQDVS--QSNVI
BCR1_LODEL WLKGVLSDDGNNKKTNNEDSMMIDGGDGNNGDGNLQKKNRDSMDLSLREASINSVIGSGSNEKFFSPHRRSQTLPPPIEGTSMKNDSDVALDRKPAS
BCR1_CANPA SLPSIKNLPPIG-----NFHSSNGGG-----PMNVNNASVGGGER---RDVRN
BCR1_CANOR SLPSIKNLPPIG-----NSLSSNGTT-----NMNT--STSDGEM---RDVRD
Clustal Consensus * . : *

```

```

      910      920      930      940      950      960      970      980      990     1000
BCR1_CANVI VTNNTSSS--NNNYSTSTEVIDDSMRTSTPS--IKSEHSNDTLHTTTVVLK---KEQPQQPLVP-----
BCR1_CANTR IANNTTS--NNNYSTSTEVIDESMRTSTPS--IRSDNSNDTIHSTTVVLK---KDHQAPSIVSTS-----
BCR1_CANDU INSNQKS--KQESGPTLESTELT---NIGASS--IKSTHSTETLQTTMVIYN---KSDTPTATITTTTNESSNTNATT---
BCR1_CANAL IDSNNNNGDKMVNKNLNFQSIELHDNNNNNTPS--IKSTHSTETIQTTMVVYN---KSDPPLSTPTTNTNTNSTATTN---
BCR1_LODEL VNKHANIG--ASSILSVQNETLKRPLILNHDNDEGIDGGHSSQSVHLLSNRSGLYSKPLQLPTLPPVNSGASGSGSGGSGINNGDRRDGNMTNGALPS
BCR1_CANPA VNGHSIG-----SVGSLIHNEEESTTIAS--TSNNANVTASTSMNTTT---SETLQKSN-----
BCR1_CANOR TNGHSIG-----SVGSLIHNDE-STNVTN--TDTVTTTSTVNTTVGDSA-----SSSTGKSN-----
Clustal Consensus : . . . . : : :

```

```

      1010     1020     1030
BCR1_CANVI ----HVSKKPTINNLLISPSNPEVSIKEE
BCR1_CANTR ----HVSKKPTINNLLISQSPNEVSIKEE
BCR1_CANDU ---SEYVSKKPTINNLLISPSPPQ-----
BCR1_CANAL --ATGYVSKKPTINNLLISQ-----
BCR1_LODEL VPASPVVSKKPTINSLIM-----
BCR1_CANPA -----WLKGVLNNDKQRQ-----
BCR1_CANOR -----WLKGVLNNEKRRQ-----
Clustal Consensus * . : *

```
